# Supplementary material for: Momilactones A and B Are α-Amylase and α-Glucosidase Inhibitors
Source: PubMed Central journal article supplement (PMC6385104; doi:10.3390/molecules24030482), 2019-01-29
Supplement: molecules-24-00482-s001.pdf [file molecules-24-00482-s001.pdf]

**Table S1.** The fragmentation patterns and intensity data of momilactone A

| Peak | Fragmentation pattern (m/z) | Relative intensity (%) | Intensity | Peak | Fragmentation pattern (m/z) | Relative intensity (%) | Intensity |
|------|-----------------------------|------------------------|-----------|------|-----------------------------|------------------------|-----------|
| 1    | 29.13                       | 21.92                  | 155949.10 | 82   | 136.40                      | 7.08                   | 50387.20  |
| 2    | 39.13                       | 23.86                  | 169761.76 | 83   | 137.38                      | 8.58                   | 61067.64  |
| 3    | 40.14                       | 7.56                   | 53771.94  | 84   | 141.40                      | 13.24                  | 94220.79  |
| 4    | 41.15                       | 84.62                  | 601975.69 | 85   | 142.40                      | 11.43                  | 81336.00  |
| 5    | 42.13                       | 4.31                   | 30639.69  | 86   | 143.41                      | 27.59                  | 196281.84 |
| 6    | 42.16                       | 6.10                   | 43422.10  | 87   | 144.42                      | 12.24                  | 87041.62  |
| 7    | 43.14                       | 14.86                  | 105744.85 | 88   | 145.43                      | 33.22                  | 236323.80 |
| 8    | 43.17                       | 11.21                  | 79721.02  | 89   | 146.44                      | 12.74                  | 90649.82  |
| 9    | 44.11                       | 2.01                   | 14318.28  | 90   | 147.45                      | 19.91                  | 141634.95 |
| 10   | 51.16                       | 6.01                   | 42770.76  | 91   | 148.43                      | 8.28                   | 58871.09  |
| 11   | 52.17                       | 3.89                   | 27673.41  | 92   | 149.44                      | 8.29                   | 58947.08  |
| 12   | 53.18                       | 45.10                  | 320831.78 | 93   | 150.41                      | 6.99                   | 49701.97  |
| 13   | 54.19                       | 5.71                   | 40602.19  | 94   | 151.42                      | 6.96                   | 49543.00  |
| 14   | 55.16                       | 22.41                  | 159393.50 | 95   | 152.42                      | 4.87                   | 34639.45  |
| 15   | 55.20                       | 58.06                  | 413048.53 | 96   | 153.42                      | 5.16                   | 36676.51  |
| 16   | 56.21                       | 3.07                   | 21815.81  | 97   | 154.43                      | 3.39                   | 24138.81  |
| 17   | 57.18                       | 3.51                   | 24982.46  | 98   | 155.44                      | 11.07                  | 78765.00  |
| 18   | 57.22                       | 2.88                   | 20512.19  | 99   | 156.45                      | 7.79                   | 55396.87  |
| 19   | 65.21                       | 23.86                  | 169748.99 | 100  | 157.46                      | 23.95                  | 170372.08 |
| 20   | 66.22                       | 9.82                   | 69825.32  | 101  | 158.47                      | 9.80                   | 69738.01  |
| 21   | 67.23                       | 53.80                  | 382724.15 | 102  | 159.48                      | 20.95                  | 149038.77 |
| 22   | 68.20                       | 3.77                   | 26821.67  | 103  | 160.45                      | 3.73                   | 26568.96  |
| 23   | 68.23                       | 14.37                  | 102248.88 | 104  | 160.49                      | 5.71                   | 40653.62  |
| 24   | 69.21                       | 8.06                   | 57363.93  | 105  | 161.46                      | 15.08                  | 107279.19 |
| 25   | 69.25                       | 10.81                  | 76901.74  | 106  | 162.47                      | 5.33                   | 37898.79  |
| 26   | 77.23                       | 51.52                  | 366475.96 | 107  | 162.50                      | 3.17                   | 22559.26  |
| 27   | 78.24                       | 13.64                  | 97064.75  | 108  | 163.48                      | 6.51                   | 46286.97  |
| 28   | 79.25                       | 74.82                  | 532220.17 | 109  | 165.45                      | 3.60                   | 25641.83  |
| 29   | 80.26                       | 14.85                  | 105606.64 | 110  | 167.46                      | 3.15                   | 22439.70  |
| 30   | 81.27                       | 100.00                 | 711378.71 | 111  | 169.48                      | 10.26                  | 72961.77  |
| 31   | 82.28                       | 8.63                   | 61374.82  | 112  | 170.49                      | 5.96                   | 42416.07  |
| 32   | 83.22                       | 4.92                   | 35019.92  | 113  | 171.50                      | 19.28                  | 137173.16 |
| 33   | 83.25                       | 3.03                   | 21585.51  | 114  | 172.51                      | 7.36                   | 52340.88  |
| 34   | 83.29                       | 3.49                   | 24802.88  | 115  | 173.49                      | 18.60                  | 132304.97 |
| 35   | 89.26                       | 2.43                   | 17303.54  | 116  | 174.49                      | 8.66                   | 61583.81  |
| 36   | 91.28                       | 88.12                  | 626895.60 | 117  | 175.50                      | 15.45                  | 109879.62 |
| 37   | 92.28                       | 13.45                  | 95648.47  | 118  | 176.51                      | 6.21                   | 44146.60  |
| 38   | 93.30                       | 35.37                  | 251644.15 | 119  | 177.49                      | 10.92                  | 77678.72  |
| 39   | 94.30                       | 9.00                   | 64016.23  | 120  | 183.53                      | 9.04                   | 64324.66  |
| 40   | 95.28                       | 5.16                   | 36724.36  | 121  | 184.53                      | 4.87                   | 34633.34  |
| 41   | 95.32                       | 29.91                  | 212803.54 | 122  | 185.55                      | 15.22                  | 108288.25 |
| 42   | 96.32                       | 2.69                   | 19162.76  | 123  | 186.52                      | 2.68                   | 19061.10  |

| Peak | Fragmentation pattern (m/z) | Relative intensity (%) | Intensity | Peak | Fragmentation pattern (m/z) | Relative intensity (%) | Intensity |
|------|-----------------------------|------------------------|-----------|------|-----------------------------|------------------------|-----------|
| 43   | 97.26                       | 2.77                   | 19708.39  | 124  | 186.55                      | 4.27                   | 30381.33  |
| 44   | 97.30                       | 3.20                   | 22740.45  | 125  | 187.53                      | 21.93                  | 156017.39 |
| 45   | 102.29                      | 2.44                   | 17378.63  | 126  | 188.54                      | 9.51                   | 67646.72  |
| 46   | 103.30                      | 13.14                  | 93478.42  | 127  | 189.55                      | 16.48                  | 117207.09 |
| 47   | 104.31                      | 6.43                   | 45713.91  | 128  | 190.52                      | 3.26                   | 23175.01  |
| 48   | 105.32                      | 51.05                  | 363144.81 | 129  | 190.56                      | 5.19                   | 36913.76  |
| 49   | 106.33                      | 12.80                  | 91061.47  | 130  | 192.51                      | 3.51                   | 24967.78  |
| 50   | 107.30                      | 3.66                   | 26061.82  | 131  | 197.57                      | 4.24                   | 30190.81  |
| 51   | 107.34                      | 20.50                  | 145854.91 | 132  | 198.58                      | 5.08                   | 36143.67  |
| 52   | 108.31                      | 4.27                   | 30361.90  | 133  | 199.59                      | 94.19                  | 670069.40 |
| 53   | 108.35                      | 5.29                   | 37632.60  | 134  | 200.58                      | 21.03                  | 149620.70 |
| 54   | 109.32                      | 9.10                   | 64745.74  | 135  | 201.57                      | 14.38                  | 102311.84 |
| 55   | 109.36                      | 4.24                   | 30151.68  | 136  | 202.58                      | 11.09                  | 78896.30  |
| 56   | 110.33                      | 4.32                   | 30766.11  | 137  | 213.63                      | 31.30                  | 222681.58 |
| 57   | 111.31                      | 3.93                   | 27947.45  | 138  | 214.64                      | 9.36                   | 66613.44  |
| 58   | 115.33                      | 33.93                  | 241361.78 | 139  | 217.56                      | 5.92                   | 42078.07  |
| 59   | 116.34                      | 14.78                  | 105139.90 | 140  | 223.64                      | 3.68                   | 26193.83  |
| 60   | 117.35                      | 36.34                  | 258546.65 | 141  | 227.66                      | 16.17                  | 115022.23 |
| 61   | 118.35                      | 12.89                  | 91694.09  | 142  | 228.66                      | 9.42                   | 67046.42  |
| 62   | 119.37                      | 37.97                  | 270075.96 | 143  | 229.66                      | 8.28                   | 58922.01  |
| 63   | 120.37                      | 10.58                  | 75287.47  | 144  | 232.61                      | 17.62                  | 125323.91 |
| 64   | 121.35                      | 8.16                   | 58065.78  | 145  | 233.62                      | 3.08                   | 21931.57  |
| 65   | 121.38                      | 10.20                  | 72560.31  | 146  | 241.68                      | 8.12                   | 57779.21  |
| 66   | 122.36                      | 8.17                   | 58129.18  | 147  | 242.69                      | 5.32                   | 37847.55  |
| 67   | 122.39                      | 2.81                   | 19994.57  | 148  | 243.70                      | 8.53                   | 60673.48  |
| 68   | 123.37                      | 23.63                  | 168081.69 | 149  | 255.73                      | 39.06                  | 277846.13 |
| 69   | 124.38                      | 10.02                  | 71312.31  | 150  | 256.73                      | 7.80                   | 55473.33  |
| 70   | 127.35                      | 7.49                   | 53285.42  | 151  | 257.71                      | 6.31                   | 44893.35  |
| 71   | 128.36                      | 26.81                  | 190715.16 | 152  | 258.72                      | 5.74                   | 40835.30  |
| 72   | 129.37                      | 30.94                  | 220112.47 | 153  | 259.73                      | 4.28                   | 30431.47  |
| 73   | 130.38                      | 12.58                  | 89459.41  | 154  | 270.78                      | 24.40                  | 173608.38 |
| 74   | 131.39                      | 41.00                  | 291634.31 | 155  | 271.75                      | 35.80                  | 254646.40 |
| 75   | 132.40                      | 16.81                  | 119599.81 | 156  | 272.76                      | 11.55                  | 82142.84  |
| 76   | 133.41                      | 57.11                  | 406256.05 | 157  | 286.80                      | 8.47                   | 60244.49  |
| 77   | 134.38                      | 2.82                   | 20029.66  | 158  | 299.80                      | 29.08                  | 206867.80 |
| 78   | 134.42                      | 10.48                  | 74535.18  | 159  | 300.81                      | 6.01                   | 42747.39  |
| 79   | 135.39                      | 6.34                   | 45075.48  | 160  | 314.85                      | 97.49                  | 693541.65 |
| 80   | 135.43                      | 6.92                   | 49245.99  | 161  | 315.86                      | 20.88                  | 148502.57 |
| 81   | 136.37                      | 7.70                   | 54755.48  |      |                             |                        |           |

**Table S2.** The fragmentation patterns and intensity data of momilactone B

| Peak | Fragmentation pattern (m/z) | Relative intensity (%) | Intensity | Peak | Fragmentation pattern (m/z) | Relative intensity (%) | Intensity |
|------|-----------------------------|------------------------|-----------|------|-----------------------------|------------------------|-----------|
| 1    | 29.01                       | 2.89                   | 14790.27  | 84   | 154.11                      | 7.11                   | 36391.31  |
| 2    | 29.05                       | 21.18                  | 108463.98 | 85   | 155.12                      | 29.24                  | 149731.29 |
| 3    | 31.03                       | 2.87                   | 14672.55  | 86   | 156.13                      | 14.24                  | 72902.55  |
| 4    | 39.03                       | 23.25                  | 119048.10 | 87   | 157.13                      | 45.01                  | 230483.38 |
| 5    | 40.04                       | 7.83                   | 40088.47  | 88   | 158.14                      | 16.61                  | 85049.95  |
| 6    | 41.05                       | 90.58                  | 463789.86 | 89   | 159.15                      | 24.57                  | 125797.38 |
| 7    | 42.05                       | 6.61                   | 33849.35  | 90   | 160.12                      | 8.70                   | 44542.20  |
| 8    | 43.03                       | 37.04                  | 189653.34 | 91   | 161.17                      | 20.54                  | 105146.81 |
| 9    | 43.06                       | 12.45                  | 63758.81  | 92   | 163.11                      | 24.64                  | 126139.99 |
| 10   | 44.00                       | 3.82                   | 19540.20  | 93   | 164.12                      | 9.03                   | 46212.52  |
| 11   | 45.01                       | 4.61                   | 23608.27  | 94   | 165.11                      | 7.95                   | 40721.53  |
| 12   | 45.04                       | 3.04                   | 15546.07  | 95   | 167.12                      | 9.00                   | 46083.67  |
| 13   | 51.04                       | 5.93                   | 30354.96  | 96   | 168.13                      | 4.86                   | 24910.37  |
| 14   | 52.04                       | 3.66                   | 18725.85  | 97   | 169.14                      | 27.09                  | 138708.38 |
| 15   | 53.05                       | 44.08                  | 225710.93 | 98   | 170.10                      | 4.52                   | 23157.42  |
| 16   | 54.06                       | 5.88                   | 30114.55  | 99   | 170.14                      | 9.33                   | 47780.04  |
| 17   | 55.03                       | 21.88                  | 112037.96 | 100  | 171.15                      | 42.43                  | 217252.28 |
| 18   | 55.07                       | 47.41                  | 242744.55 | 101  | 172.12                      | 13.24                  | 67774.60  |
| 19   | 57.05                       | 5.77                   | 29530.08  | 102  | 173.13                      | 21.55                  | 110335.75 |
| 20   | 65.05                       | 24.53                  | 125604.19 | 103  | 174.14                      | 7.01                   | 35871.33  |
| 21   | 66.06                       | 9.12                   | 46684.66  | 104  | 175.11                      | 5.92                   | 30317.80  |
| 22   | 67.07                       | 43.71                  | 223826.58 | 105  | 175.15                      | 4.65                   | 23819.02  |
| 23   | 68.04                       | 5.07                   | 25984.53  | 106  | 176.12                      | 17.57                  | 89951.33  |
| 24   | 68.08                       | 11.38                  | 58277.88  | 107  | 177.13                      | 6.55                   | 33514.14  |
| 25   | 69.05                       | 12.07                  | 61808.91  | 108  | 179.12                      | 4.85                   | 24841.77  |
| 26   | 69.09                       | 10.29                  | 52705.20  | 109  | 181.14                      | 8.84                   | 45255.03  |
| 27   | 71.06                       | 4.25                   | 21783.00  | 110  | 183.12                      | 48.60                  | 248855.28 |
| 28   | 77.06                       | 54.13                  | 277146.92 | 111  | 184.13                      | 19.22                  | 98391.16  |
| 29   | 78.06                       | 16.38                  | 83882.04  | 112  | 185.17                      | 36.79                  | 188396.34 |
| 30   | 79.07                       | 67.05                  | 343323.17 | 113  | 186.16                      | 11.60                  | 59380.41  |
| 31   | 80.08                       | 11.60                  | 59417.03  | 114  | 187.15                      | 10.54                  | 53975.46  |
| 32   | 81.05                       | 3.70                   | 18921.49  | 115  | 189.13                      | 14.26                  | 72994.85  |
| 33   | 81.09                       | 60.89                  | 311769.87 | 116  | 190.14                      | 6.76                   | 34600.65  |
| 34   | 82.09                       | 5.10                   | 26116.42  | 117  | 195.16                      | 9.50                   | 48633.69  |
| 35   | 83.03                       | 3.89                   | 19940.43  | 118  | 197.14                      | 37.70                  | 193038.93 |
| 36   | 83.07                       | 4.48                   | 22921.92  | 119  | 198.14                      | 17.49                  | 89535.27  |
| 37   | 89.06                       | 3.42                   | 17507.47  | 120  | 199.15                      | 18.38                  | 94086.63  |
| 38   | 91.07                       | 100.00                 | 512035.48 | 121  | 200.16                      | 8.84                   | 45289.42  |
| 39   | 92.08                       | 16.48                  | 84402.12  | 122  | 201.13                      | 25.41                  | 130084.44 |
| 40   | 93.09                       | 28.88                  | 147854.22 | 123  | 202.14                      | 15.58                  | 79796.57  |
| 41   | 94.10                       | 4.72                   | 24163.73  | 124  | 203.15                      | 10.40                  | 53270.69  |
| 42   | 95.07                       | 6.82                   | 34920.63  | 125  | 209.14                      | 3.35                   | 17143.44  |

| Peak | Fragmentation pattern (m/z) | Relative intensity (%) | Intensity | Peak | Fragmentation pattern (m/z) | Relative intensity (%) | Intensity |
|------|-----------------------------|------------------------|-----------|------|-----------------------------|------------------------|-----------|
| 43   | 95.11                       | 7.44                   | 38094.92  | 126  | 209.17                      | 6.10                   | 31243.79  |
| 44   | 97.05                       | 8.09                   | 41439.53  | 127  | 211.19                      | 23.59                  | 120769.47 |
| 45   | 97.09                       | 4.18                   | 21413.02  | 128  | 213.16                      | 7.39                   | 37834.50  |
| 46   | 98.06                       | 4.96                   | 25405.56  | 129  | 213.20                      | 5.82                   | 29817.68  |
| 47   | 103.08                      | 17.42                  | 89220.66  | 130  | 215.15                      | 14.98                  | 76705.22  |
| 48   | 104.08                      | 15.13                  | 77448.59  | 131  | 216.16                      | 17.14                  | 87760.43  |
| 49   | 105.09                      | 58.27                  | 298384.27 | 132  | 217.17                      | 9.28                   | 47530.58  |
| 50   | 106.10                      | 9.54                   | 48833.50  | 133  | 223.16                      | 8.54                   | 43741.62  |
| 51   | 107.07                      | 5.81                   | 29736.56  | 134  | 225.21                      | 15.26                  | 78153.66  |
| 52   | 107.11                      | 10.68                  | 54698.20  | 135  | 226.17                      | 21.33                  | 109234.81 |
| 53   | 109.09                      | 4.64                   | 23751.78  | 136  | 227.19                      | 14.69                  | 75221.90  |
| 54   | 111.07                      | 5.53                   | 28302.59  | 137  | 229.17                      | 13.37                  | 68447.53  |
| 55   | 115.08                      | 46.10                  | 236057.94 | 138  | 231.18                      | 8.01                   | 41006.01  |
| 56   | 116.09                      | 18.63                  | 95398.13  | 139  | 232.19                      | 7.88                   | 40371.66  |
| 57   | 117.10                      | 51.57                  | 264037.45 | 140  | 237.18                      | 6.73                   | 34466.45  |
| 58   | 118.10                      | 14.87                  | 76162.78  | 141  | 239.19                      | 52.13                  | 266913.86 |
| 59   | 119.11                      | 28.07                  | 143740.50 | 142  | 240.20                      | 10.69                  | 54741.98  |
| 60   | 120.12                      | 4.46                   | 22811.48  | 143  | 241.18                      | 7.64                   | 39117.49  |
| 61   | 121.09                      | 14.64                  | 74984.38  | 144  | 243.17                      | 11.35                  | 58091.09  |
| 62   | 121.13                      | 3.43                   | 17547.24  | 145  | 244.17                      | 21.20                  | 108542.62 |
| 63   | 122.10                      | 6.27                   | 32124.70  | 146  | 251.19                      | 8.80                   | 45059.77  |
| 64   | 123.11                      | 4.46                   | 22821.91  | 147  | 253.21                      | 11.24                  | 57559.82  |
| 65   | 127.08                      | 12.18                  | 62373.54  | 148  | 255.19                      | 8.92                   | 45690.92  |
| 66   | 128.09                      | 43.37                  | 222054.34 | 149  | 256.20                      | 9.77                   | 50035.95  |
| 67   | 129.10                      | 59.83                  | 306335.36 | 150  | 257.21                      | 57.09                  | 292340.22 |
| 68   | 130.10                      | 20.88                  | 106927.74 | 151  | 258.21                      | 13.14                  | 67287.28  |
| 69   | 131.11                      | 42.69                  | 218591.83 | 152  | 262.17                      | 10.36                  | 53047.31  |
| 70   | 132.12                      | 10.83                  | 55431.24  | 153  | 266.22                      | 10.87                  | 55681.63  |
| 71   | 133.09                      | 6.28                   | 32145.29  | 154  | 267.23                      | 5.59                   | 28644.31  |
| 72   | 133.13                      | 10.22                  | 52319.58  | 155  | 268.24                      | 6.90                   | 35352.70  |
| 73   | 135.11                      | 6.59                   | 33763.51  | 156  | 269.21                      | 8.55                   | 43799.24  |
| 74   | 141.10                      | 29.11                  | 149058.13 | 157  | 270.21                      | 6.89                   | 35261.99  |
| 75   | 142.11                      | 24.58                  | 125872.34 | 158  | 271.22                      | 6.54                   | 33512.39  |
| 76   | 143.12                      | 52.61                  | 269401.06 | 159  | 284.23                      | 14.14                  | 72416.01  |
| 77   | 144.12                      | 19.96                  | 102202.93 | 160  | 285.24                      | 13.61                  | 69702.70  |
| 78   | 145.13                      | 36.27                  | 185713.95 | 161  | 294.22                      | 9.80                   | 50185.53  |
| 79   | 146.10                      | 5.43                   | 27808.54  | 162  | 297.21                      | 5.41                   | 27686.34  |
| 80   | 146.14                      | 5.82                   | 29780.10  | 163  | 312.24                      | 21.54                  | 110307.30 |
| 81   | 147.11                      | 12.65                  | 64796.96  | 164  | 313.24                      | 4.65                   | 23824.56  |
| 82   | 152.09                      | 6.21                   | 31784.72  | 165  | 330.25                      | 14.86                  | 76102.35  |
| 83   | 153.10                      | 9.90                   | 50697.82  |      |                             |                        |           |

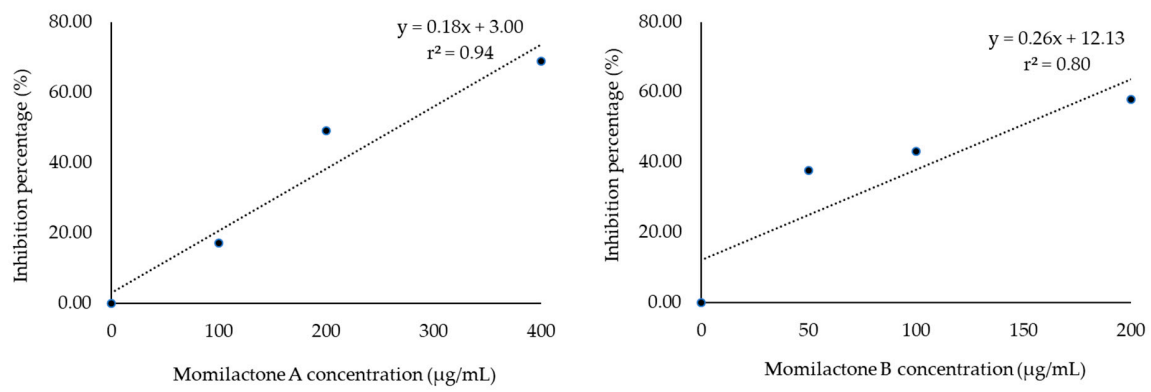

**Figure S1.** Inhibition of momilactones A and B on  $\alpha$ -amylase activity

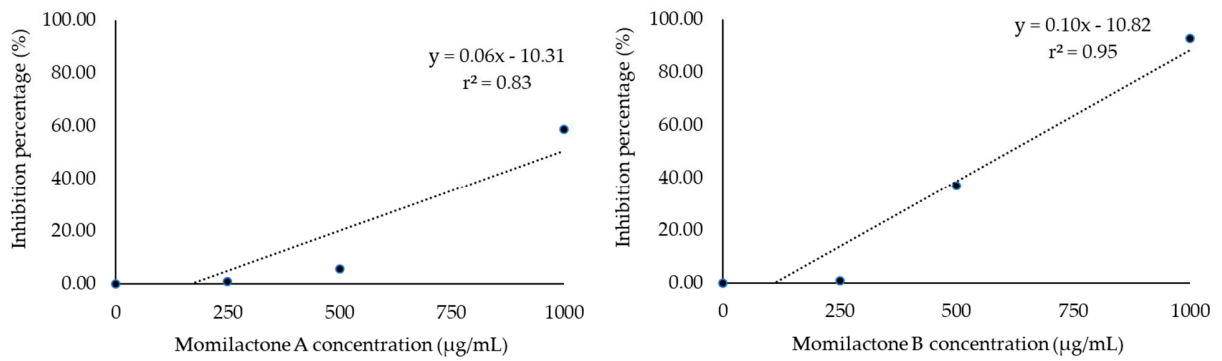

**Figure S2.** Inhibition of momilactones A and B on  $\alpha$ -glucosidase activity
